# Supplementary material for: Electronic Gambling Engagement and Psychosocial Outcomes Among University Students in Ibadan, Nigeria: A Theory of Planned Behavior Perspective
Source: Research Square preprint supplement (doi:10.21203/rs.3.rs-8436822/v1), 2026-01-09
Supplement: Supplementary file 1 [file cb150feb31e3fdc90e9f6e4f.docx]

**Study Questionnaire**

**Title:** Electronic Gambling Engagement and Psychosocial Outcomes Among University Students in Ibadan, Nigeria

**Instructions:** This questionnaire is designed to understand students' views and experiences regarding electronic gambling. Your participation is voluntary, and all responses are strictly confidential. Please tick (√) the appropriate box or write your response where indicated.

**Section A: Socio-demographics**

| Q# | Question | Response / Options |
| --- | --- | --- |
| 1 | **Age (in years)** | .............................. |
| 2 | **Gender** | [ ] Male  [ ] Female |
| 3 | **Level of Study** | [ ] Undergraduate  [ ] Postgraduate |
| 4 | **Employment Status**  *(Are you currently employed alongside your studies?)* | [ ] Yes  [ ] No |
| 5 | **Monthly Income/Allowance**  *(Estimate average monthly income from all sources)* | .............................. (Naira) |

**Section B: Gambling Behavior**

| Q# | Question | Response / Options |
| --- | --- | --- |
| 6 | **Lifetime Prevalence**  *(Have you ever engaged in electronic gambling like betting, poker, slots?)* | [ ] Yes *(Proceed to Q7)*  [ ] No *(Skip to Section C)* |
| 7 | **Frequency of Gambling** | [ ] Daily  [ ] Weekly  [ ] Monthly  [ ] Rarely/Occasionally |
| 8 | **Preferred Game Type** | [ ] Sports Betting  [ ] Poker  [ ] Slot Machines  [ ] Online Casino Games  [ ] Other: .............................. |

**Section C: Opinions and Beliefs**

Please indicate how much you agree or disagree with the following statements.

(Key: 1 = Strongly Disagree, 2 = Disagree, 3 = Neutral, 4 = Agree, 5 = Strongly Agree)

| **Attitude** | **1** | **2** | **3** | **4** | **5** |
| --- | --- | --- | --- | --- | --- |
| **9.** Gambling is a viable way to make money. | [ ] | [ ] | [ ] | [ ] | [ ] |
| **10.** I view gambling as a financial investment rather than just a game. | [ ] | [ ] | [ ] | [ ] | [ ] |
| **11.** Gambling is an exciting activity. | [ ] | [ ] | [ ] | [ ] | [ ] |
| **12.** I feel positive about the idea of placing bets. | [ ] | [ ] | [ ] | [ ] | [ ] |
| **13.** Gambling is a good strategy to supplement my income. | [ ] | [ ] | [ ] | [ ] | [ ] |
| **Subjective Norms** | **1** | **2** | **3** | **4** | **5** |
| **14.** My close friends approve of gambling. | [ ] | [ ] | [ ] | [ ] | [ ] |
| **15.** Most students I know engage in gambling. | [ ] | [ ] | [ ] | [ ] | [ ] |
| **16.** I feel social pressure from my peers to gamble. | [ ] | [ ] | [ ] | [ ] | [ ] |
| **Perceived Behavioral Control** | **1** | **2** | **3** | **4** | **5** |
| **17.** I am confident in my ability to predict the outcome of games/bets. | [ ] | [ ] | [ ] | [ ] | [ ] |
| **18.** I have a system or skill that increases my chances of winning. | [ ] | [ ] | [ ] | [ ] | [ ] |
| **19.** Whether I win or lose is largely up to my own skill. | [ ] | [ ] | [ ] | [ ] | [ ] |
| **20.** It is easy for me to access gambling platforms whenever I want. | [ ] | [ ] | [ ] | [ ] | [ ] |

**Section D: Economic Hardship**

| **Q#** | **Question** | **Response / Options** |
| --- | --- | --- |
| **21** | **Income Adequacy**  *(How would you describe your financial situation?)* | [ ] More than enough for my needs  [ ] Just enough for my needs  [ ] Not enough for my needs |
| **22** | **Financial Stress Scale**  *(Please rate your agreement: 1=Strongly Disagree to 5=Strongly Agree)* | **Rating (1-5)** |
|  | a. I frequently worry about meeting my daily financial needs. | [1] [2] [3] [4] [5] |
|  | b. I often have to borrow money to survive in school. | [1] [2] [3] [4] [5] |
|  | c. I feel financially insecure compared to my peers. | [1] [2] [3] [4] [5] |

**Section E: Psychosocial and Academic Effects**

(To be answered only if you have ever gambled).

(Key: 1 = Strongly Disagree, 2 = Disagree, 3 = Neutral, 4 = Agree, 5 = Strongly Agree)

| **Statement** | **1** | **2** | **3** | **4** | **5** |
| --- | --- | --- | --- | --- | --- |
| **23.** Gambling has increased my level of stress and anxiety. | [ ] | [ ] | [ ] | [ ] | [ ] |
| **24.** I have experienced financial strain (e.g., debt, lack of food money) due to gambling. | [ ] | [ ] | [ ] | [ ] | [ ] |
| **25.** My gambling has negatively affected my academic performance (e.g., missing classes, lower grades). | [ ] | [ ] | [ ] | [ ] | [ ] |
| **26.** I have felt unable to stop or control my gambling behavior. | [ ] | [ ] | [ ] | [ ] | [ ] |
| **27.** I have borrowed money or sold personal items to fund gambling. | [ ] | [ ] | [ ] | [ ] | [ ] |
